1 **Impact of the COVID-19 Pandemic on Same-day Discharge Adoption Following Percutaneous**  
2 **Coronary Intervention for Stable CAD: A National Time Series Analysis**

3 Manoj Thangam MD<sup>1</sup>, Michael Grzeskowiak, MD<sup>1</sup>, Frederick A Masoudi MD, MSPH<sup>2</sup>, Matthew C  
4 Bunte, MD, MS<sup>3</sup>, Edward Fry MD<sup>4</sup>, Mark Pirwitz MD<sup>1</sup>, Allison Ottenbacher PhD<sup>5</sup>, Ana Cristina  
5 Perez MD Phd<sup>5</sup>, Collin Miller MS<sup>5</sup>, Sarah Benedict MBA<sup>1</sup>, Amit Amin MD MSc<sup>6</sup>, Sahil A. Parikh  
6 MD<sup>7</sup>, Peter Monteleone MD<sup>1</sup>.

7

8 **Author Affiliations:**

9 <sup>1</sup>Ascension Texas Cardiovascular, University of Texas at Austin Dell School of Medicine, Austin,  
10 TX. <sup>2</sup>Chief Science Officer, VP of Research and Analytics, Ascension Health, Saint Louis, Missouri.  
11 <sup>3</sup> University of Missouri-Kansas City, Department of Medicine, Kansas City, MO; Saint Luke's Mid  
12 America Heart Institute, Kansas City, MO. <sup>4</sup>Ascension Indiana St. Vincent, Indianapolis, Indiana.  
13 <sup>5</sup>Ascension Data Science Institute, Ascension Health, Saint Louis, Missouri. <sup>6</sup> Rush University  
14 Medical Center, Chicago, IL <sup>7</sup> New York Presbyterian Columbia University Irving Medical Center,  
15 New York, NY.

16

17 **Short Title**

18 Same-day Discharge Post Coronary Intervention

19

20 **Corresponding Author:**

21 Manoj Thangam MD, Ascension Texas Cardiovascular, The University of Texas at Austin Dell

22 School of Medicine, 1301 West 38<sup>th</sup> Street, Suite 400, Austin, Texas 78701

23 Phone: 405-388-4941

24 Email: Manoj.Thangam@ascension.org

25 **Word Count:** 3059

26

27

28

29 **Abstract**

30

31 **Background:**

32 Elective percutaneous coronary intervention (PCI) historically required hospitalization post  
33 procedure. Same day discharge (SDD) has emerged as a safe and cost efficient option, although  
34 the impact of the coronavirus disease of 2019 (COVID-19) pandemic on rates of SDD and  
35 associated care episode costs remains uncertain.

36

37 **Methods:**

38 A national sample of consecutive patients undergoing elective PCI at 42 hospitals (Ascension,  
39 St.Louis, MO) between May 2019 to April 2021 were identified using internal registry data and  
40 administrative claims data. Rates of SDD before and after the COVID-19 pandemic (March 2020)  
41 were compared using multivariable logistic regression adjusted for patient and procedural  
42 characteristics. Additionally, an interrupted time series model was used to determine the effect  
43 of the pandemic and policy on SDD rates before and after pandemic declaration. Lastly, we  
44 estimated total costs per PCI episode in pre and post pandemic periods.

45

46 **Results:**

47 In total, 12,740 interventions were performed within 42 Ascension facilities that met study  
48 eligibility criteria (5955 PCI prior to the pandemic and 6785 after). Demographic data were  
49 similar between both populations although higher rates of dyslipidemia, prior myocardial  
50 infarction, and heart failure history were noted in the post pandemic group. Pandemic

51 declaration was associated with a higher likelihood of SDD (OR 2.09, CI 1.93-2.25,  $p < 0.001$ ).  
52 From pre-pandemic to post-pandemic, mean SDD rose from 34% to 45% ( $p < 0.001$ ) with an  
53 accelerated monthly SDD adoption rate after the pandemic (0.1% per month vs 1.0% per  
54 month,  $p=0.02$ ). Total costs per episode were \$679.52 (95% CI \$476.12 – \$882.92,  $p < 0.001$ )  
55 higher in the post-pandemic period, driven by increased material costs. SDD was associated  
56 with a \$2137.05 (95% CI \$1925.03 - \$2349.07,  $p < 0.001$ ) reduction in costs relative to non-SDD  
57 episodes throughout the study period.

58

59 Conclusion:

60 Among a large national risk-adjusted sample of consecutive patients, the COVID-19 pandemic  
61 accelerated adoption of SDD. As a care strategy, SDD was associated with reduced episode  
62 costs during elective PCI in the post-pandemic period .

63

64 Introduction

65 Percutaneous coronary intervention (PCI) remains a commonly used therapy to treat  
66 symptomatic obstructive coronary artery disease (CAD) with about 600,000 interventions  
67 performed annually in the US.<sup>1,2,3</sup> With the evolution of PCI, procedural efficacy and safety  
68 have improved considerably.<sup>4,5</sup> During the early period of coronary intervention, patients were  
69 often observed in the hospital for days due to concern for acute stent thrombosis, coronary  
70 dissection, procedural failure, antithrombotic regimens, and access site complications.<sup>5</sup>  
71 Substantial improvements in procedural techniques, technology, and operator experience have  
72 facilitated safe same day discharge (SDD) among selected populations undergoing elective  
73 PCI.<sup>4,5,6</sup> Several studies have demonstrated the safety of SDD following elective PCI for stable  
74 CAD within regional centers and national registries,<sup>7-12</sup> with no difference in 30-day all-cause  
75 mortality or rehospitalizations.<sup>11</sup> Furthermore, SDD is associated with no difference in access  
76 site complications or acute kidney injury.<sup>13,14</sup> The evidence base supporting SDD utilization has  
77 resulted in guideline recommendations encouraging adoption of SDD in suitable patient  
78 populations undergoing elective PCI.<sup>14,15</sup>

79

80 The increasing costs of cardiovascular care highlights the importance of judicious resource  
81 allocation and the need to tailor healthcare policies to improve costs concurrent with quality of  
82 care.<sup>16</sup> Policy measures including the Affordable Care Act and ensuing bundled payment  
83 programs have incentivized the delivery of higher value care by enhancing quality, reducing  
84 cost, or both.<sup>17</sup> In the United States, SDD has been estimated to save about \$5000 per  
85 procedure with a potential national cost savings approaching \$577 million through widespread

86 adoption with savings driven primarily by reduced supply utilization along with room and board  
87 expenditures.<sup>7</sup> In addition to the cost savings inherent to reducing length of stay, the value of  
88 bed availability is more pertinent than ever before considering the COVID-19 global pandemic.  
89 This pandemic placed a spotlight on the importance of reducing hospital admissions and  
90 improving cost within our strained health system. Ascension organized a collaborative system  
91 wide effort focusing on SDD rates to meet these demands. The potential for improving cost,  
92 efficiency, and bed availability using SDD without compromising patient outcomes during the  
93 COVID-19 pandemic prompted the development and implementation of our SDD directive at  
94 Ascension, a large US health system.

95

96 Accordingly, the objectives of this analysis were to describe characteristics among those  
97 allocated to SDD after elective PCI for stable CAD, effectiveness of an institutional SDD  
98 implementation, as well as describe trends relative to the onset of the COVID-19 pandemic in  
99 SDD utilization and the impact of SDD on total care costs. These results may expose  
100 opportunities to improve appropriate adoption of SDD and thereby enhance effectiveness and  
101 efficiency of PCI for stable CAD.

102

103 Methods

104 Study Design and Participants

105

106 This was a retrospective observational analysis from a large non-profit hospital network  
107 (Ascension, St. Louis, MO) of 151 hospitals in 21 states and the District of Columbia evaluating

108 the impact of the COVID-19 pandemic and a national quality improvement program on SDD  
109 utilization using a time series design. Patients were identified by evaluation of the Ascension  
110 internal National Cardiovascular Data Registry (NCDR) CathPCI registry. Consecutive adults aged  
111 > 18 years undergoing elective PCI with survival to hospital discharge treated between May  
112 2019 and April 2021 were eligible for inclusion. The study was reviewed and approved by the  
113 central institutional review board with informed consent waived as a quality improvement  
114 initiative.

115

116 Variables

117

118 The primary outcome was SDD rate, which was compared before and after declaration of the  
119 COVID-19 pandemic (March 2020). Secondary endpoints included the SDD rate after  
120 implementation of a national SDD program (May 2020) and total episode costs to evaluate the  
121 impact of SDD utilization. Total episode costs were normalized across the study period and  
122 estimated using institutional accounting software that provided nationalized average cost for  
123 PCI encounter within the Ascension Health System. Subjects that were ineligible for SDD were  
124 also excluded from the analysis and included those with the following concurrent conditions:  
125 cardiogenic shock, major procedural complications including perforation and dissection,  
126 bleeding or vascular complication, PCI indication of acute coronary syndrome (ST elevation  
127 myocardial infarction, non-ST elevation myocardial infarction, and unstable angina), use of  
128 mechanical circulatory support (intra-aortic balloon pump, implantable intracardiac pump, or  
129 extracorporeal membrane oxygenation), cardiac arrest during or prior to admission, post

130 procedural heart failure, cardiac tamponade, or any post procedure stroke. The definitions for  
131 exclusion criteria (cardiogenic shock, procedural complications, acute coronary syndrome,  
132 mechanical circulatory support, cardiac arrest, heart failure, cardiac tamponade, and stroke)  
133 are aligned with those established by the NCDR Cath PCI Registry.

134

135 Data

136

137 Clinical data were collected and aggregated from internal system wide NCDR Cath-PCI registry  
138 entries using proprietary quality data abstraction software and merged with internal billing  
139 data. In addition to conforming to the requirements of the ACC-NCDR data quality program<sup>18</sup>,  
140 including periodic external audits, Ascension performs weekly data quality audits to ensure the  
141 consistency and accuracy of data abstraction. Patients identified from this registry were linked  
142 to cost accounting data for our analysis. Each encounter is divided into cost categories and the  
143 aggregate sum of all categories for admission encompasses the total encounter cost. To  
144 account for variability in cost over the study periods and across markets, costs were normalized  
145 by deriving an average cost per item to facilitate standardization despite time and location of  
146 hospital encounter.

147

148 Same Day Discharge Policy

149

150 Prior to the COVID-19 pandemic, SDD occurred within individual Ascension hospitals and  
151 operators without specific system-wide clinical guidance. With the operational impact of the



152 pandemic, clinicians were confronted with the need to reduce patient and staff infection  
153 exposure risk, costs associated with overnight admission, and optimize PCI efficiencies. In  
154 response to these needs, a committee of interventional cardiologists (Ascension Interventional  
155 Cardiology Affinity Group) representing several of its PCI programs developed a SDD protocol  
156 that was approved and implemented in May 2020 (see Supplemental Figure 1).

157

158 The SDD policy implementation that began in May 2020 was unique in several key aspects.  
159 First, individual hospitals were offered organizational support in the form of shared policy  
160 templates, educational resources, and clinical guidance. However, each was allowed to develop  
161 and execute individualized hospital policies to increase SDD. Second, each site was informed  
162 that their SDD rates would be tracked with a minimum goal of increasing SDD among elective  
163 PCIs to  $\geq 15\%$  of total PCIs performed (the ACC NCDR Cath PCI average in March 2020).  
164 Additionally, individual center SDD rates would be assessed in the context of rates nationally  
165 and among Ascension sites. Lastly, minimal financial expenditures were required in the  
166 development, initiation, and monitoring of this policy since each individual center was  
167 responsible for policy development and SDD monitoring was integrated into established quality  
168 metrics that are evaluated on an ongoing basis.

169 The COVID-19 pandemic affected elective PCI volumes, delivery, and availability of hospital  
170 beds. Therefore, evaluating the impact of the SDD initiative separate from the pandemic effect  
171 was not plausible. To best represent the data, we evaluated SDD among the elective PCI  
172 population prior and post declaration of the pandemic (March 2020). Notably, the  
173 implementation of the Ascension SDD policy did not occur until May 2020 following the

174 national pandemic declaration. Therefore, the study focused on SDD rates pre and post  
175 pandemic understanding that the SDD policy also effected SDD adoption throughout our  
176 medical system.

177

178 Statistics

179

180 Demographic characteristics are presented as mean  $\pm$  SD for continuous variables and  
181 proportions for categorical variables. Demographics between those treated prior to the  
182 pandemic were compared to those treated post using either the Pearsons chi squared test or  
183 Student's T-test as appropriate. We evaluated the likelihood of SDD using a logistic regression  
184 model adjusting for significant confounders between the pre-pandemic and post- pandemic  
185 population. Confounders included age, sex, Black race, treatment period with reference to the  
186 pandemic, heart failure, and radial access. We performed a segmented regression with a  
187 monthly interrupted time series to better quantify the expected number of SDD before and  
188 after the pandemic. A linear relationship between time and average monthly SDD was  
189 assumed, and we used New-West standard errors for coefficients estimated by ordinary least-  
190 squares regression. Lastly, we evaluated the cost associated with elective PCI with a general  
191 linear regression model adjusting for the pandemic timeframe (before and after declaration  
192 March 2020), SDD, and additional covariates. All covariates for the different models were  
193 identified by univariate significance or were historically known significant variables. All  
194 statistical analyses were performed using R statistical software version 4.0.2 (R Project for

195 Statistical Computing) and Stata version 17 (Stata Corp, College Station, Texas). A 2-sided p  
196 value of  $\leq 0.05$  was considered statistically significant.

197

## 198 Results

199

200 Between May 2019 to April 2021, 12,740 patients undergoing PCI for stable CAD were  
201 analyzed, including those receiving SDD (n=5588) and non-SDD (n=7152). Patients discharged  
202 the same day tended to be younger (67.0 vs 68.9,  $p<0.001$ ), less frequently female (27.2% vs  
203 32.5%,  $p<0.001$ ) and Black (5.9% vs 8.0%,  $p<0.001$ ) (see Supplemental Table 1). Those receiving  
204 SDD were less likely to have comorbidities including peripheral artery disease (15.6% vs 17.9%,  
205  $p<0.001$ ), diabetes mellitus (43.6% vs 46.2%,  $p<0.001$ ), receive dialysis (1.5% vs 2.5%,  $p<0.001$ ),  
206 and have heart failure (22.6% vs 29.2%,  $p<0.001$ ). Access site for PCI was also significantly  
207 different among discharge cohorts (ANOVA  $p<0.001$ ), with radial access being utilized more  
208 frequently in the SDD cohort (68.9% vs 41.7%,  $p < 0.001$ ).

209

210 Among those receiving SDD, age, sex, the proportion of Black and Hispanic patients and other  
211 clinical characteristics were similar between pre and post pandemic groups (see Table 1).

212 However, those receiving elective PCI after the pandemic had a higher percentage of  
213 dyslipidemia ( $p<0.001$ ), prior myocardial infarction ( $p<0.001$ ), and history of heart failure  
214 ( $p<0.001$ ). Access site for PCI did not differ between SDD groups before and after onset of the  
215 pandemic.

216

217 Nationally, the rate of SDD increased significantly after the onset of the pandemic (34% vs 45%,  
218  $p < 0.001$ ) (see Figure 1). In segmented monthly interrupted time series analysis, the mean  
219 month-over-month rate of SDD adoption increased by 0.1% and 1.0% in pre-pandemic and  
220 post-pandemic periods, respectively ( $p = 0.02$ ) (see Figure 2). The odds of SDD were higher  
221 among men (1.23, 1.13-1.33,  $p < 0.001$ ), non-Black patients (1.39, 1.20-1.62,  $p < 0.001$ ), those  
222 treated in the post-pandemic period (OR 2.09, CI 1.93-2.25,  $p < 0.001$ ), and among those  
223 receiving radial access (OR 3.05, 2.83-3.29,  $p < 0.001$ ) (see Table 2). The odds of SDD were lower  
224 with increasing age (OR 0.99, 0.98-0.99,  $p < 0.001$ ) and among those with heart failure (0.77,  
225 0.71-0.84,  $p < 0.001$ ).

226

227 By episode of care, SDD was associated with significant total cost savings of \$2137.05 (95% CI  
228 \$1925.02 to \$2349.07 less than pre-pandemic,  $p < 0.001$ ) per PCI hospital encounter after  
229 accounting for inter year cost variation of pre and post pandemic and other relevant covariates.  
230 The cost variability pre and post pandemic was noted to be an average increase in material cost  
231 of \$679.52 (95% CI \$476.12 to \$882.92;  $p$  value  $< 0.001$ ) in the post pandemic period.

232

233 Several variables were associated with increased total episode costs (see Table 3). The greatest  
234 drivers of increased costs included heart failure (\$1167.15 per episode, 95% CI, \$936.93-  
235 \$1398.08;  $p < 0.001$ ) and peripheral artery disease (\$713.91 per episode, 95% CI, \$443.14-  
236 \$984.68). The factors associated with the largest reductions in episodic care costs following  
237 PCI for stable CAD included SDD (-\$2731.05 per episode, 95% CI, -\$2349.08- -\$1925.03;  
238  $p < 0.001$ ) and non-Black race (-\$910.77 per episode, 95% CI, -\$1302.68 - -\$518.87;  $p < 0.001$ ).

239

240 Discussion

241

242 In this large, national, consecutive experience of SDD before and after the COVID-19 pandemic  
243 we found SDD rates increased over the study period. The increase in SDD rates persisted along  
244 with a trend in monthly growth of SDD rates at 1 year after onset of the pandemic. The  
245 adoption of SDD was associated with reduced total episode costs despite a relative increase in  
246 overall costs of elective PCI in the post pandemic period.

247

248 The SDD protocol emerged from ongoing quality improvement efforts as well as in response to  
249 the COVID -19 pandemic within the Ascension Interventional Cardiology Affinity Group. Before  
250 the pandemic and implementation of the SDD protocol, wide variation of SDD was noted  
251 among individual centers, with individual institutional rates below the national registry average  
252 for many. Initiation of this protocol established SDD rates as a quality metric actively tracked by  
253 our health system with the intention to hold individual centers and operators accountable. The  
254 post pandemic period along with the SDD protocol facilitated in improvement in SDD rates  
255 throughout Ascension Healthcare. Although aggregate trends across the system showed an  
256 increase in SDD, there was variability among individual centers with a minority showing no  
257 change or a decrease in SDD. These were primarily small centers with low PCI volumes and  
258 likely represents variability inherent to low volume centers.

259

260 The use of radial access has been previously reported to be associated with reduced  
261 periprocedural bleeding and reduced length of stay.<sup>6,7,19,20</sup> This analysis found that radial access  
262 had the strongest influence on a SDD strategy, though rates of radial access use were not  
263 significantly different before and after the onset of the pandemic. Therefore, the adoption of  
264 radial access for PCI of stable CAD may contribute to the success of a SDD strategy and facilitate  
265 the other tangible benefits of reduced healthcare utilization also observed in this analysis.

266

267 Our study showed that SDD facilitated cost savings during the post pandemic period within our  
268 health system. The increase in cost after onset of the pandemic is attributed to the increase in  
269 supplies and facilities due to inflation over the study period. Despite this increase in cost of  
270 elective PCI after the pandemic declaration, there was significant reduction in total episodic  
271 costs. This highlights the potential for SDD to facilitate improved healthcare efficiency even  
272 with increasing equipment and facility costs currently experienced by systems throughout the  
273 country.

274

275 Another important aspect of the SDD policy implementation was its potential to improve  
276 hospital bed availability. The COVID-19 pandemic impacted health care systems throughout the  
277 world. With the CDC declaration of the pandemic in March 2020, the SDD policy seemed more  
278 relevant than ever before to facilitate needed procedures in a world where hospital occupancy  
279 was pushed to the brink.<sup>21,22</sup> Our SDD policy was developed over a 6-month period prior to  
280 enactment in May of 2020; however, the COVID-19 pandemic effected the implementation and  
281 adoption of the policy. It is likely that the policy improvement of SDD was impacted by the lack

282 of available beds during the pandemic and the desire to reduce hospital stays as much as  
283 possible. However, the improvement in SDD has been persistent in our national system at  
284 follow up extending to 12 months after pandemic declaration supporting some persistent  
285 impact from the SDD policy.

286

### 287 Study Limitations

288 Several limitations are inherent to this retrospective observational analysis and deserve  
289 mention. First, the effect of the COVID-19 pandemic on SDD policy adoption cannot be  
290 attributed based on the nature of this evaluation being non-randomized and which may be  
291 confounded by contemporaneous institutional efforts to promote SDD. The effect of COVID on  
292 the SDD policy likely increased SDD rates and policy adoption. Yet, the persistent increase in  
293 SDD supports the continued effect of the policy on improving SDD among patients undergoing  
294 PCI for stable CAD. Second, although Ascension is a large nationally represented health system  
295 the generalizability of these results are uncertain and require additional confirmation.

296 Furthermore, female patients, non-White, and non-Hispanic patients were underrepresented  
297 relative to estimates within the national population. Third, unidentified confounders, including  
298 characteristics of the medical history and prior treatment, as well as circumstances of the  
299 population, including health-related social needs, were not measured. Future research should  
300 explore the utility of SDD among the underserved community to confirm consistent benefits.

301 We included a consecutive population to limit selection bias among those undergoing PCI for  
302 stable CAD. Lastly, the SDD policy developed by individual centers had minor variability due to  
303 the discretion of individual centers. Therefore, despite a national policy mandate, individual

304 policies and its implementation varied between Ascension sites. This study did not evaluate  
305 post-discharge outcomes, including rates of major adverse cardiovascular events or rates of  
306 readmission, to assess safety of the SDD strategy since post discharge data were unavailable for  
307 evaluation. Furthermore, prior studies have shown SDD to be safe in selected PCI  
308 populations.<sup>4,5,6</sup>

309

310 Conclusion

311

312 From a large consecutive national sample, rates of SDD increased following the onset of the  
313 COVID-19 pandemic and were subsequently associated with concurrent reductions in episode  
314 care costs. Initiatives that promote SDD and radial access may facilitate expansion of SDD  
315 adoption and thereby extend the clinical benefits and efficiencies provided by both care  
316 strategies.

317

318

319

320



321 **Acknowledgements:** None

322

323 **Sources of Funding:** None

324

325 **Disclosures:**

326 Dr. Bunte has received institutional research funding from Inari Medical and Janssen

327 Pharmaceuticals. Dr. Bunte is a consultant to Inari Medical, Shockwave Medical, Abbott, and

328 Viz.ai. Dr. Amin has research grants from GE healthcare, Boston Scientific, and Chiesi. Dr.

329 Parikh has institutional research funding from Abbott, Boston Scientific, Shockwave, TriReme,

330 Reflow, Acotec, Concept Medical, Veryan Medical. He is on the advisory board of Abbott,

331 Boston Scientific, Cordis, Medtronic, Philips. He also consults for BD, Pneumbra, Terumo, and

332 Inari. Dr Monteleone is on the scientific advisory boards and is a consultant for Abbott, Boston

333 Scientific, and Medtronic. He also receives institutional grant support from Abbott and

334 Biotronik.

335

336

337

338

339 **References**

3401. Inohara T, Kohsaka S, Spertus JA, Masoudi FA, Rumsfeld JS, Kennedy KF, Wang TY, Yamaji K,  
341 Amano T, Nakamura M. Comparative Trends in Percutaneous Coronary Intervention in Japan  
342 and the United States, 2013 to 2017. *J Am Coll Cardiol*. 2020 Sep 15;76(11):1328-1340. doi:  
343 10.1016/j.jacc.2020.07.037. PMID: 32912447.
3442. Writing Group Members, Mozaffarian D, Benjamin EJ, et al. Heart Disease and Stroke Statistics-  
345 2016 Update: A Report From the American Heart Association. *Circulation*. 2016;133(4):e38-360.  
346 doi:10.1161/CIR.0000000000000350
3473. Seto AH, Shroff A, Abu-Fadel M, et al. Length of stay following percutaneous coronary  
348 intervention: An expert consensus document update from the society for cardiovascular  
349 angiography and interventions. *Catheter Cardiovasc Interv*. 2018;92(4):717-731.  
350 doi:10.1002/ccd.27637
3514. Venkitachalam L, Kip KE, Selzer F, Wilensky RL, Slater J, Mulukutla SR, Marroquin OC, Block PC,  
352 Williams DO, Kelsey SF; Investigators of NHLBI-Sponsored 1985-1986 PTCA and 1997-2006  
353 Dynamic Registries. Twenty-year evolution of percutaneous coronary intervention and its  
354 impact on clinical outcomes: a report from the National Heart, Lung, and Blood Institute-  
355 sponsored, multicenter 1985-1986 PTCA and 1997-2006 Dynamic Registries. *Circ Cardiovasc*  
356 *Interv*. 2009 Feb;2(1):6-13. doi: 10.1161/CIRCINTERVENTIONS.108.825323. Epub 2008 Dec 15.  
357 PMID: 20031687; PMCID: PMC3024012.

3585. Serruys PW, Rutherford JD. The Birth, and Evolution, of Percutaneous Coronary Interventions: A  
359 Conversation With Patrick Serruys, MD, PhD. *Circulation*. 2016 Jul 12;134(2):97-100. doi:  
360 10.1161/CIRCULATIONAHA.116.023681. PMID: 27400895.
3616. Bradley SM, Kaltenbach LA, Xiang K, Amin AP, Hess PL, Maddox TM, Poulouse A, Brilakis ES,  
362 Sorajja P, Ho PM, Rao SV. Trends in Use and Outcomes of Same-Day Discharge Following  
363 Elective Percutaneous Coronary Intervention. *JACC Cardiovasc Interv*. 2021 Aug 9;14(15):1655-  
364 1666. doi: 10.1016/j.jcin.2021.05.043. PMID: 34353597.
3657. Amin AP, Pinto D, House JA, et al. Association of Same-Day Discharge After Elective  
366 Percutaneous Coronary Intervention in the United States With Costs and Outcomes. *JAMA*  
367 *Cardiol*. 2018;3(11):1041-1049. doi:10.1001/jamacardio.2018.3029
3688. Brayton KM, Patel VG, Stave C, de Lemos JA, Kumbhani DJ. Same-day discharge after  
369 percutaneous coronary intervention: a meta-analysis. *J Am Coll Cardiol*. 2013;62(4):275-285.  
370 doi:10.1016/j.jacc.2013.03.051
3719. Bundhun PK, Soogund MZS, Huang WQ. Same Day Discharge versus Overnight Stay in the  
372 Hospital following Percutaneous Coronary Intervention in Patients with Stable Coronary Artery  
373 Disease: A Systematic Review and Meta-Analysis of Randomized Controlled Trials. *PLOS ONE*.  
374 2017;12(1):e0169807. doi:10.1371/journal.pone.0169807
37510. Kim M, Muntner P, Sharma S, et al. Assessing patient-reported outcomes and preferences for  
376 same-day discharge after percutaneous coronary intervention: results from a pilot randomized,  
377 controlled trial. *Circ Cardiovasc Qual Outcomes*. 2013;6(2):186-192.  
378 doi:10.1161/circoutcomes.111.000069

37911. Madan M, Bagai A, Overgaard CB, et al. Same-Day Discharge After Elective Percutaneous  
380 Coronary Interventions in Ontario, Canada. *J Am Heart Assoc.* 2019;8(13):e012131.  
381 doi:10.1161/JAHA.119.012131
38212. Taxiarchi P, Kontopantelis E, Martin GP, et al. Same-Day Discharge After Elective Percutaneous  
383 Coronary Intervention. *Insights Br Cardiovasc Interv Soc.* 2019;12(15):1479-1494.  
384 doi:10.1016/j.jcin.2019.03.030
38513. Heyde GS, Koch KT, de Winter RJ, et al. Randomized Trial Comparing Same-Day Discharge With  
386 Overnight Hospital Stay After Percutaneous Coronary Intervention. *Circulation.*  
387 2007;115(17):2299-2306. doi:10.1161/CIRCULATIONAHA.105.591495
38814. Chambers CE, Dehmer GJ, Cox DA, et al. Defining the length of stay following percutaneous  
389 coronary intervention: an expert consensus document from the Society for Cardiovascular  
390 Angiography and Interventions. Endorsed by the American College of Cardiology Foundation.  
391 *Catheter Cardiovasc Interv.* 2009;73(7):847-858. doi:10.1002/ccd.22100
39215. Rao, SV, Vidovich MI, Gilchrist IC, Gulati R, Gutierrez JA, Hess CN, Kaul P, Martinez S, Rymer J.  
393 2021 ACC Expert Consensus Decision Pathway on Same-Day Discharge After Percutaneous  
394 Coronary Intervention: A Report of the American College of Cardiology Solution Set Oversight  
395 Committee. *J Am Coll Cardiol.* 2021 Feb, 77 (6) 811–825
39616. Birger M, Kaldjian AS, Roth GA, Moran AE, Dieleman JL, Bellows BK. Spending on Cardiovascular  
397 Disease and Cardiovascular Risk Factors in the United States: 1996 to 2016. *Circulation.* 2021 Jul  
398 27;144(4):271-282.

39917. Collins CR, Wick E. Center for Medicare and Medicaid Services Bundled Payment for Care  
400 Improvement- Advanced for Major Bowel Surgery: Do We Have the Tools We Need to Succeed?  
401 J Am Coll Surg. 2019;229(4):S53. doi:10.1016/j.jamcollsurg.2019.08.129

40218. Malenka DJ, Bhatt DL, Bradley SM, Shahian DM, Draoui J, Segawa CA, Koutras C, Abbott  
403 JD, Blankenship JC, Vincent R, Windle J, Tsai TT, Curtis J, Roe M, Masoudi FA. The  
404 National Cardiovascular Data Registry Data Quality Program 2020: JACC State-of-the-  
405 Art Review. J Am Coll Cardiol. 2022 May 3;79(17):1704-1712. doi:  
406 10.1016/j.jacc.2022.02.034. PMID: 35483759.

40719. Amin AP, Rao SV, Seto AH, Thangam M, Bach RG, Pancholy S, Gilchrist IC, Kaul P, Shah B, Cohen  
408 MG, Gluckman TJ, Bortnick A, DeVries JT, Kulkarni H, Masoudi FA. Transradial Access for High-  
409 Risk Percutaneous Coronary Intervention: Implications of the Risk-Treatment Paradox. Circ  
410 Cardiovasc Interv. 2021 Jul;14(7):e009328. doi: 10.1161/CIRCINTERVENTIONS.120.009328.  
411 Epub 2021 Jul 13. PMID: 34253050; PMCID: PMC8895384.

41220. Lindner SM, McNeely CA, Amin AP. The Value of Transradial: Impact on Patient Satisfaction and  
413 Health Care Economics. Interv Cardiol Clin. 2020 Jan;9(1):107-115. doi:  
414 10.1016/j.iccl.2019.08.004. PMID: 31733737; PMCID: PMC7772820.

41521. Kirkpatrick JN, Hull SC, Fedson S, Mullen B, Goodlin SJ. Scarce-Resource Allocation and Patient  
416 Triage During the COVID-19 Pandemic: JACC Review Topic of the Week. J Am Coll Cardiol. 2020  
417 Jul 7;76(1):85-92. doi: 10.1016/j.jacc.2020.05.006. Epub 2020 May 11. PMID: 32407772; PMCID:  
418 PMC7213960.

41922. French G, Hulse M, Nguyen D, Sobotka K, Webster K, Corman J, Aboagye-Nyame B, Dion M,  
420 Johnson M, Zalinger B, Ewing M. Impact of Hospital Strain on Excess Deaths During the COVID-

421 19 Pandemic - United States, July 2020-July 2021. MMWR Morb Mortal Wkly Rep. 2021 Nov  
422 19;70(46):1613-1616. doi: 10.15585/mmwr.mm7046a5. PMID: 34793414; PMCID:  
423 PMC8601411.  
424

425 Tables and Figures

426

427 Table 1: Baseline characteristics among those undergoing SDD after elective PCI, according to

428 period of treatment before or following onset of the COVID-19 pandemic.

| Baseline characteristic | SDD Before Pandemic<br>(May 2019 – April 2020)<br>N= 5955 | SDD After Pandemic<br>(March 2020 – April 2021)<br>N= 6785 | P value |
|-------------------------|-----------------------------------------------------------|------------------------------------------------------------|---------|
| Age, mean (SD)          | 68.1 (10.5)                                               | 68.0 (10.4)                                                | 0.69    |
| Female                  | 1819 (30.5%)                                              | 2024 (29.8%)                                               | 0.38    |
| Black\ African American | 418 (7.0%)                                                | 481 (7.1%)                                                 | 0.88    |
| Hispanic                | 177 (3.0%)                                                | 169 (2.5%)                                                 | 0.10    |
| Hypertension            | 5584 (93.8%)                                              | 6357 (93.7%)                                               | 0.86    |
| Dyslipidemia            | 5451 (91.5%)                                              | 6390 (94.2%)                                               | <0.001  |
| Prior MI                | 1929 (32.4%)                                              | 2362 (34.8%)                                               | <0.001  |
| PAD                     | 985 (16.5%)                                               | 1167 (17.2%)                                               | 0.33    |
| Prior PCI               | 3232 (54.3%)                                              | 3703 (54.6%)                                               | 0.73    |
| DM                      | 2680 (45.0%)                                              | 3065 (45.2%)                                               | 0.85    |
| Currently on Dialysis   | 131 (2.2%)                                                | 136 (2.0%)                                                 | 0.44    |
| HF                      | 1457 (24.5%)                                              | 1892 (27.9%)                                               | <0.001  |
| Tobacco Use             |                                                           |                                                            |         |

|             |              |              |      |
|-------------|--------------|--------------|------|
| Current     | 1056 (17.7%) | 1230 (18.1%) | 0.33 |
| Former      | 2510 (42.1%) | 2837 (41.8%) |      |
| Never       | 2264 (38.0%) | 2604 (38.4%) |      |
| Unknown     | 125 (2.1%)   | 114 (1.7%)   |      |
| Access site |              |              | 0.47 |
| Femoral     | 2772 (46.5%) | 3085 (45.5%) |      |
| Radial      | 3158 (53.0%) | 3670 (54.1%) |      |
| Other       | 25 (0.4%)    | 30 (0.4%)    |      |

429

430 IQR: interquartile range, SD: standard deviation, MI: myocardial infarction, PAD: peripheral

431 artery disease, PCI: percutaneous coronary intervention, DM: diabetes mellitus, HF: heart

432 failure, SDD: same day discharge.

433



434 Table 2: Predictors of SDD during PCI for stable CAD.

435

| Baseline characteristic | Odds Ratio | 95% CI       | P-value |
|-------------------------|------------|--------------|---------|
| Age                     | 0.99       | 0.98 to 0.99 | <0.001  |
| Male                    | 1.23       | 1.13 to 1.33 | <0.001  |
| After Pandemic          | 2.09       | 1.94 to 2.26 | <0.001  |
| Non-African American    | 1.39       | 1.20 to 1.62 | <0.001  |
| Heart Failure           | 0.77       | 0.71 to 0.84 | <0.001  |
| Radial Access           | 3.05       | 2.83 to 3.29 | <0.001  |

436

437 CI: confidence interval, Age was evaluated with 1 year increase regarding coefficients and odds

438 ratio. PCI: percutaneous coronary intervention, HF: heart failure.

439 Table 3: : Risk-adjusted contributors to total episodic care costs (USD) during PCI for stable CAD.

| Baseline characteristic   | Coefficient | 95% CI                       | P value |
|---------------------------|-------------|------------------------------|---------|
| Age*                      | \$24.60     | \$14.45 to \$34.74           | <0.001  |
| Male                      | \$379.91    | \$11.96 to \$598.12          | 0.001   |
| After Pandemic            | \$679.5     | \$476.12 to \$882.92         | <0.001  |
| Same day Discharge        | -\$2731.05  | -\$2349.07 to -<br>\$1925.03 | <0.001  |
| Non-African American      | -\$910.77   | -\$1302.68 to -\$518.87      | <0.001  |
| Peripheral artery disease | \$713.91    | \$443.14 to \$ 984.68        | <0.001  |
| HF                        | \$1167.15   | \$936.93 to \$1398.08        | <0.001  |
| Prior PCI                 | -\$828.90   | -\$1034.06 to -\$623.74      | <0.001  |
| Dyslipidemia              | -\$541.48   | -\$937.93 to -\$145.02       | <0.01   |
| Diabetes                  | \$285.53    | \$81.99 to \$489.06          | <0.001  |
| Current Smoker            | \$427.89    | \$153.99 to \$701.80         | <0.01   |
| Radial access             | -\$484.34   | -\$694.38 to -\$274.29       | <0.001  |

440 \* Per one year increase in age, CI: confidence interval, PCI: percutaneous coronary intervention,

441 HF: heart failure.

442

443

444 Figure 1: Segmented Regression with Interrupted Time Series Analysis Displaying Pre Policy and  
445 Post Policy Same Day Discharge Percentages.

446

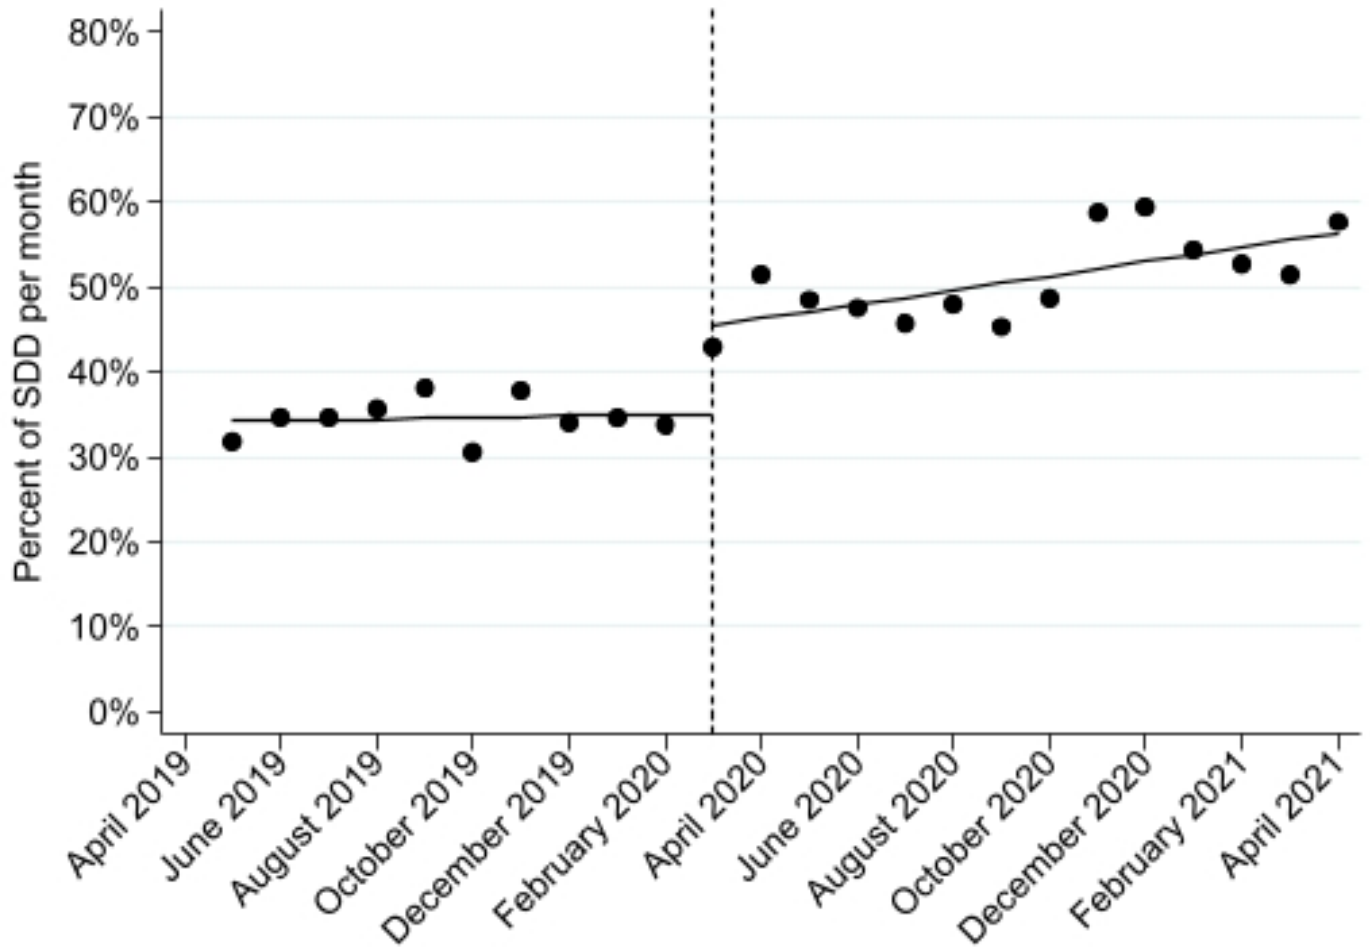

447

448

449

450 Supplemental Appendix

451 Table 1: Baseline characteristics of patients undergoing elective PCI, according to same-day  
 452 discharge status.

453

| Baseline characteristic         | Non-SDD<br>N=7152 | SDD<br>N=5588 | P value |
|---------------------------------|-------------------|---------------|---------|
| Age, mean (SD)                  | 68.9 (10.4)       | 67.0 (10.3)   | <0.001  |
| Female                          | 2323 (32.5%)      | 1520 (27.2%)  | <0.001  |
| Black\ African American         | 572 (8.0%)        | 327 (5.9%)    | <0.001  |
| Hispanic                        | 197 (2.8%)        | 149 (2.7%)    | 0.80    |
| Hypertension                    | 6706 (93.8%)      | 5235 (93.7%)  | 0.85    |
| Dyslipidemia                    | 6621 (92.6%)      | 5220 (93.4%)  | 0.07    |
| Prior MI                        | 2393 (33.5%)      | 1898 (34.0%)  | 0.55    |
| PAD (Peripheral Artery Disease) | 1279 (17.9%)      | 873 (15.6%)   | <0.001  |
| Prior PCI                       | 3840 (53.7%)      | 3095 (55.4%)  | 0.06    |
| DM                              | 3307 (46.2%)      | 2438 (43.6%)  | <0.01   |
| Currently on Dialysis           | 181 (2.5%)        | 86 (1.5%)     | <0.001  |
| HF                              | 2088 (29.2%)      | 1261 (22.6%)  | <0.001  |
| Tobacco Use                     |                   |               |         |

|             |              |              |        |
|-------------|--------------|--------------|--------|
| Current     | 1207 (16.9%) | 1079 (19.3%) |        |
| Former      | 3092 (43.2%) | 2255 (40.4%) |        |
| Never       | 2715 (38.0%) | 2153 (38.5%) |        |
| Unknown     | 138 (1.9%)   | 101 (1.8%)   | <0.001 |
| Access site |              |              |        |
| Femoral     | 4141 (57.9%) | 1716 (30.7%) |        |
| Radial      | 2979 (41.7%) | 3849 (68.9%) |        |
| Other       | 32 (0.4%)    | 23 (0.4%)    | <0.001 |
| Pandemic    |              |              |        |
| Before      | 3865 (54.0%) | 2090 (37.4%) |        |
| After       | 3287 (46.0%) | 3498 (62.6%) | <0.001 |

454

455 IQR: interquartile range, SD: standard deviation, MI: myocardial infarction, PAD: peripheral

456 artery disease, PCI: percutaneous coronary intervention, DM: diabetes mellitus, HF: heart

457 failure, SDD: same day discharge.

458

459 Figure 1: Same Day Discharge Protocol Diagram.

460

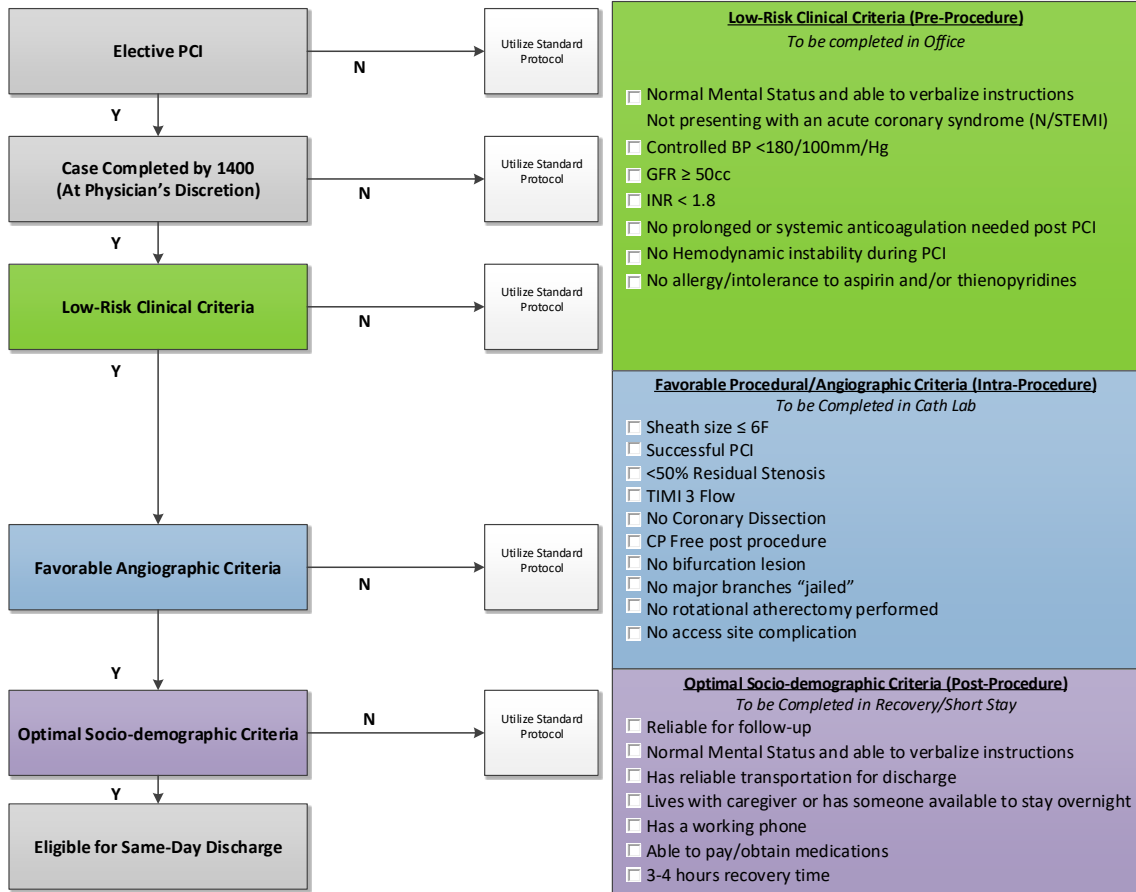

461
